# Supplementary material for: Analysis of the National Institutes of Health COVID-19 Neuro Databank by geographic region and income status
Source: Research Square preprint supplement (doi:10.21203/rs.3.rs-7371770/v1), 2025-10-06
Supplement: Supplementary file 1 [file 87160dfda5c5120fb696c154.xlsx]

## Sheet: non-authors_supplMat
First Name	Last Name	Affiliation
Adenike	Adeagbo	Medical Center Information Technology, NYU Grossman School of Medicine, New York, NY, USA
Albert	Anderson	Division Infectious Diseases, Emory University School of Medicine, Atlanta, GA, USA
David García	Azorín	Servicio de Neurología, Hospital Clínico Universitario de Valladolid, Valladolid, Spain
Adarsh	Bhimraj1	Department of Infectious Diseases, Cleveland Clinic, Cleveland, OH, USA
Judy	Burnfield	Institute for Rehabilitation Science and Engineering, Madonna Rehabilitation Hospitals, Lincoln, NE, USA
Sherry	Chou	Department of Critical Care Medicine, University of Pittsburgh Medical Center, Pittsburgh, PA, USA
Adam	DeHavenon2	Department of Neurology, University of Utah, Salt lake City, UT, USA
Monica M.	Diaz	Multiple Sclerosis/Neuroimmunology Division, Department of Neurology, University of North Carolina at Chapel Hill, Chapel Hill, NC, USA
Raj	Dhar	Division Neurocritical Care, Department of Neurology, Washington University School of Medicine, St. Louis, MO, USA
Keith	Dombrowski	Neurocritical Care Division, Deptartment of Neurosurgery and Brain Repair, University of South Florida, Tampa, FL, USA
Jacqueline C.	Dominguez	Institute for Neurosciences, St. Luke’s Medical Center, Quezon City, Manilla, Philippines
Ericka	Fink	Department of Critical Care Medicine, University of Pittsburgh Medical Center, Pittsburgh, PA, USA
Jennifer	Frontera	Department of Neurology, NYU Grossman School of Medicine, New York, NY, USA
Alla	Guekht	Moscow Research and Clinical Center for Neuropsychiatry, Russian National Research Medical University, Moscow, Russia
Rodrigo	Hasbun	Division of Infectious Diseases, McGovern Medical School at University of Texas Health Science Center at Houston, Houston, TX, USA
Nils	Henninger	Department of Neurology, University of Massachusetts Chan Medical School, Worcester, MA, USA
Lyell	Jones Jr.	Department of Neurology, Mayo Clinic, Rochester, MN, USA
Muhib	Khan3	Department of Neurology, Spectrum Health, Grand Rapids, MI, USA
Shawn	Kile	Sutter Institute for Medical Research, Sutter Health, Sacramento, CA, USA
Yun Jin	Kim	School of Traditional Chinese Medicine, Xiamen University, Sepang, Malaysia
Anna	Klimkiewicz	Medical University of Warsaw, Warsaw, Poland
Igor J.	Koralnik	Department of Neurology, Northwestern Feinberg School of Medicine, Chicago, IL, USA
Vincent	LaBarbera	Department of Neurology, Rhode Island Hospital, Providence, RI, USA
Michael	Levy	Division of Neuroimmunology & Neuroinfectious Disease, Massachusetts General Hospital, Boston, MA, USA
Kore	Liow	Hawaii Pacific Neuroscience, NeuroCOVID Clinic, Honolulu, HI, USA
Sharon	Meropol	Division of Biostatistics, Department of Population Health, NYU Grossman School of Medicine, New York, NY, USA
Cecile J.	Norris	Division of Biostatistics, Department of Population Health, NYU Grossman School of Medicine, New York, NY, USA
Hemant	Pandey	Brain and Spine Center, Chandler, AZ, USA
Natalia	Rost	Stroke Division, Department of Neurology, Harvard Medical School, Boston, MA, USA
Mohammed	Salama	Institute of Global Health and Human Ecology, The American University in Cairo, Cairo, Egypt
Scott	Schultz	Department of Pediatric Physical Medicine and Rehabilitation, New Orleans Children Hospital, New Orleans, LA, USA
Jose I.	Suarez	Division of Neurosciences Critical Care, Departments of Anesthesiology and Critical Care Medicine, Neurology, and Neurosurgery, Johns Hopkins University, Baltimore, MD, USA
Amy	Trecartin	South Shore Health, Weymouth, MA, USA
Andrea	Troxel	Division of Biostatistics, Department of Population Health, NYU Grossman School of Medicine, New York, NY, USA
Melodie	Winawer	Department of Neurology, Columbia University Irving Medical Center, New York, NY, USA
Andrea	Wrinkler	Center for Global Health at the Technical University of Munich, Germany; Centre for Global Health at the University of Oslo, Norway
		1 Current affiliated institution: Department of Infectious Disease, Houston Methodist, Houston, TX, USA
		2 Current affiliated institution: Department of Neurology, Yale School of University, New Haven, CT, USA
		3 Current affiliated institution: Department of Neurology, Mayo Clinic, Rochester, MN, USA
